# Supplementary material for: Combined effect of 17β-estradiol and resveratrol against apoptosis induced by interleukin-1β in rat nucleus pulposus cells via PI3K/Akt/caspase-3 pathway
Source: PeerJ. 2016 Jan 26;4:e1640. doi: 10.7717/peerj.1640 (PMC4730868; doi:10.7717/peerj.1640)
Supplement: Supplemental Information 1 — Raw data and histograms used in the study. [file peerj-04-1640-s001.xlsx]

## Sheet: FACS apoptosis
Apoptotic incidence	mean	SD	F=860.1	P<0.05
	0.075	0.008
	0.14	0.005
	0.098	0.006
	0.12	0.006
	0.112	0.008
	0.1067	0.005
	0.085	0.006
	0.075	0.005
	0.043	0.0035
	0.13	0.0035

## Sheet: caspase-3
	fold	SD
Vehicle	1	0
IL-1β	5	0.31
IL-1β+E2	2.2	0.25
IL-1β+RSV	3.5	0.28
IL-1β+E2+RSV	1.1	0.18

## Sheet: MTS
	fold	SD
Vehicle	1	0
IL-1β	0.7	0.025
IL-1β+E2	0.85	0.041
IL-1β+RSV	0.78	0.028
IL-1β+E2+RSV	0.96	0.048

## Sheet: Adhesion
	mean	SD
Vehicle	1	0
IL-1β	0.63	0.03
IL-1β+E2	0.81	0.034
IL-1β+RSV	0.77	0.032
IL-1β+E2+RSV	0.89	0.041

## Sheet: qPCR1
COL2α1	mean	SD
Vehicle	1	0
IL-1β	0.71	0.032
IL-1β+E2	0.88	0.038
IL-1β+RSV	0.79	0.039
IL-1β+E2+RSV	0.98	0.045
Aggrecan	mean	SD
Vehicle	1	0
IL-1β	0.62	0.032
IL-1β+E2	0.8	0.037
IL-1β+RSV	0.77	0.041
IL-1β+E2+RSV	0.95	0.034
MMP-3	mean	SD
Vehicle	1	0
IL-1β	5.2	0.32
IL-1β+E2	2.7	0.21
IL-1β+RSV	3.7	0.32
IL-1β+E2+RSV	1.3	0.12
MMP-13	mean	SD
Vehicle	1	0
IL-1β	6	0.35
IL-1β+E2	2.5	0.15
IL-1β+RSV	2.9	0.26
IL-1β+E2+RSV	1.5	0.07

## Sheet: Western blot
	mean	SD
IL-1 β	0.12	0.01
E2+RSV	0.75	0.05
E2+RSV+ICI	0.11	0.014
E2+RSV+LY	0.14	0.022
	mean	SD
IL-1 β	0.45	0.03
E2+RSV	0.05	0.015
E2+RSV+ICI	0.41	0.035
E2+RSV+LY	0.39	0.038
